1 **Rethinking HIV care for youth: Insights from qualitative research with youth in Chad**

2 Esias Bedingar, SM <sup>1, 2, \*</sup>, Ferdinan Paningar, SM <sup>3</sup>, Ngarossorang Bedingar <sup>4</sup>, Eric Mbaidoum, MA <sup>5</sup>,

3 Naortangar Ngaradoum <sup>5</sup>, Rifat Atun, MBBS, MBA <sup>1</sup>, Aisha K. Yousafzai, PhD <sup>1</sup>

4

5 <sup>1</sup> *Global Health and Population Department, Harvard T.H. Chan School of Public Health, Boston, MA*

6 *02215, USA*

7 <sup>2</sup> *Alma, Centre de Recherche en Systèmes de Santé, Porte 107 Chagoua, N'Djamena, Chad*

8 <sup>3</sup> *Bucofore, Quartier Béguinage, Rue Joseph Brahim Seid, N'Djamena, Chad*

9 <sup>4</sup> *Croix Bleue Tchadienne, Porte N128, 7eme arrondissement, Chagoua, N'Djamena, Chad*

10 <sup>5</sup> *Réseau National des Personnes Vivants avec le VIH, N'Djamena, Chad*

11

12 \* Corresponding author: Alma, Centre de Recherche en Systèmes de Santé, N'Djamena, Chad

13 *E-mail address: [esias.bedingar@gmail.com](mailto:esias.bedingar@gmail.com) (E. Bedingar).*

## 14 **Abstract**

15 Youth ages 15-24 years are significantly impacted by the HIV/AIDS epidemic, representing  
16 approximately 37% of new infections globally. This demographic is especially vulnerable in sub-Saharan  
17 Africa, where over 80% of HIV-positive youth reside. In Chad, youth face significant barriers to effective  
18 HIV care, including high prevalence rates, particularly among young women, and substantial disparities  
19 across regions. Despite overall reductions in new HIV infections, youth remain disproportionately  
20 affected, necessitating targeted interventions to improve HIV care outcomes. This study employed  
21 thematic analysis to conduct a secondary data analysis of previously collected qualitative data. The  
22 analysis focused on understanding the pathways to care for youth living with HIV (YLHIV) in Chad,  
23 from diagnosis to antiretroviral therapy (ART) adherence. Data were collected through focus group  
24 discussions with 52 youth and 48 service providers, including healthcare workers and community actors.  
25 Grounded theory analysis was used to identify barriers and facilitators to HIV care, with data transcribed,  
26 translated, and analyzed assisted with ATLAS.ti software (Version 7.6.3). Youth reported significant  
27 barriers, including financial constraints, logistical challenges, and fear of stigma. Facilitators included  
28 supportive healthcare providers, peer support, and specialized HIV care facilities. Psychological barriers  
29 and lack of awareness were also critical factors influencing HIV testing and care engagement. The study  
30 highlighted the importance of tailored, youth-friendly services to improve care outcomes. To address the  
31 unique challenges faced by youth in Chad, healthcare services must be redesigned with active youth  
32 participation to be more adolescent-friendly and supportive. Interventions should focus on reducing  
33 stigma, improving accessibility, and providing continuous psychosocial support. By addressing these  
34 barriers, it is possible to enhance the HIV care continuum for youth, ultimately improving their health  
35 outcomes and contributing to the broader goal of ending the HIV epidemic.

36

## 37 **Introduction**

38 Youth (ages 15-24) are a crucial demographic in the global fight against HIV/AIDS, comprising about  
39 37% of new HIV infections worldwide [1-3]. Adolescents and young people (10-24 years) are especially

40 vulnerable, experiencing high HIV prevalence and suboptimal treatment outcomes [4, 5]. This issue is  
41 pressing in sub-Saharan Africa, where over 80% of youth living with HIV (YLHIV) reside [6-8], with  
42 high rates of HIV-related mortality among young people [9]. In Chad, the HIV prevalence was 1.0% in  
43 2022, down from 1.6% in 2010 and 1.4% in 2015, but varies significantly across provinces [8, 10].

44  
45 In Chad, young women face higher HIV infection rates compared to young men due to the "triple threat"  
46 of new HIV infections, sexual and gender-based violence, and adolescent pregnancies [11]. In 2022,  
47 26.3% of new HIV infections in Chad were among youth aged 15-24 [8]. Despite a 48% overall decrease  
48 in new HIV infections since 2010, youth remain disproportionately affected [8], highlighting a gap in  
49 prevention and care services tailored to this group [12].

50  
51 Youth face numerous barriers in the HIV care continuum, from testing to achieving viral suppression,  
52 including stigma, transportation issues, and the transition from pediatric to adult care [13, 14]. These  
53 challenges lead to lower linkage to care, higher attrition, and poor adherence to ART among youth  
54 compared to other age groups [15, 16]. Limited studies indicate poorer outcomes for HIV-infected youth  
55 in the care pathway [17], with significantly lower retention rates in care before initiating ART and low  
56 adherence even after starting treatment [18].

57  
58 Service delivery interventions such as counseling, peer support, financial incentives, and adolescent-  
59 friendly clinics show promise in improving linkage, retention, and adherence among youth [17, 19, 20].  
60 Integrating biomedical prevention with behavioral, psychosocial, and structural approaches can enhance  
61 the HIV care continuum, especially in the context of Chad's complex sociocultural landscape.

62  
63 This study aims to examine the pathways to care for youth to improve linkages from HIV diagnosis to  
64 ART initiation, retention, and adherence. By understanding the challenges youth face, we aim to identify  
65 strategies to enhance the continuum of HIV care for this vulnerable population.

66

## 67 **Methods**

### 68 *Study design*

69 This study is a secondary data analysis from a parent study employing grounded theory design [21, 22].

70 The stages and processes employed for the parent study are shown in the Supporting Information file (S1

71 File). The original data were collected to understand youth's sensemaking and service utilization in the

72 context of SRH and HIV care in Chad.

73

### 74 *Sampling*

75 Participants were selected using purposeful criterion sampling to ensure a diverse and relevant sample of

76 youth and healthcare providers. The sampling frame was bound to the province of N'Djamena to maintain

77 contextual relevance while allowing for a variety of perspectives. Youth, aged 15-24 years, were recruited

78 and divided into two groups: those living with HIV and those without HIV. The final sample included 52

79 youth, with an almost equal distribution of gender and HIV status. For adolescents living with HIV, we

80 collaborated with the National Executive Secretary of the Chadian National Network of Associations of

81 People Living with HIV (RNTAP<sup>+</sup>) who helped identify those willing and eligible for the study.

82 Eligibility was defined as either a male or female ages 15-24 years living with HIV. From the final list

83 provided, we randomly selected adolescent participants.

84

85 The study also included 48 service providers, divided into 3 focus group discussions (FGDs), including

86 nurses, doctors, and community actors to provide comprehensive insights into the healthcare

87 environment. Each group of service providers was sub-divided into 3 groups of 4 people for healthcare

88 workers, and 4 groups of 6 people for community actors. For both nurses and doctors, the groups reflected

89 health facility type, including public and specialized facilities for SRH and HIV care. Eligibility criteria

90 for health facilities included the existence of pediatric, maternity and SRH service areas, as well as being

91 frequently visited by youth. After selecting these facilities, the second step consisted of obtaining a list of

92 nurses and doctors who had been working at the facility for at least 6 months to ensure sufficient exposure  
93 to youth. For community actors, the four groups included those existing in Chad such as peer educators,  
94 mentor moms, expert patients, and psycho-social counselors [23].

95

#### 96 *Data collection*

97 Data were collected through FGDs conducted from 24/03/2024 to 27/03/2024. The FGDs were designed  
98 to elicit detailed accounts of participants' experiences, beliefs, and behaviors related to HIV care and  
99 ART. The sample of participants needed to encompass both homogeneity and heterogeneity at various  
100 levels. For instance, homogeneity was achieved through bounding the sampling to one province, as well  
101 as keeping sample and facility characteristics close to each other (e.g., narrowing age, YLHIV, youth  
102 living with no HIV). On the other hand, heterogeneity was achieved through increasing the number of  
103 FGD participants and bracketing participants by age groups. Typical FGDs include 6-10 participants, but  
104 since our study had participatory activities, we designed it to have 16 youth in each group, and further  
105 sub-divided them into 4 groups of 4 participants for the activities (S2 File). After data collection, this  
106 resulted in a total sample size of 52 youth, stratified by gender. Service providers participated in FGDs,  
107 discussing their roles, perceptions of adolescent-friendly healthcare, and the challenges they face in  
108 delivering HIV care to youth. Participatory action research (PAR) is a good methodological framework  
109 for social inclusion [24]. For that reason, youth and service providers took part in open-ended questions  
110 for each theme, as well as participatory activities for decision-making, community mapping, and sorting  
111 influential factors for stages 2 and 3 (S1 File). For data collection, separate topic guides were used for  
112 adolescents, healthcare workers, and community actors (S3-S5 Files).

113

114 The data collection process was facilitated by fourteen locally trained data collectors, divided into  
115 interviewers and note-takers to conduct the FGDs and participatory activities. However, study visits with  
116 female study participants occurred with at least one female study member in the room, and male

117 participant study visits occurred with at least one male study team member in the room. FGDs were  
118 conducted in French and Arabic in a private setting. All FGDs sessions, lasting between 90-120 minutes,  
119 were audio-recorded with participant consent, transcribed verbatim, and imported into ATLAS.ti (version  
120 7.6.3) to manage data and assist the analysis process [25]. To ensure transcript quality, a rigorous quality  
121 assurance process was implemented: audio recordings were cross-checked against transcripts by a  
122 secondary team member for accuracy, and the first author reviewed a sample of transcripts for  
123 consistency. Data collectors underwent comprehensive training and calibration to standardize data  
124 collection techniques, and iterative feedback loops were established to address and correct any  
125 transcription issues identified during regular debriefing sessions.

126

### 127 *Data analysis*

128 We conducted a thematic analysis using both deductive and inductive approaches [26]. Thematic analysis  
129 was chosen for its flexibility and ability to identify, analyze, and report patterns (themes) within the data,  
130 providing a rich and detailed account of the participants' experiences and perceptions. For deductive  
131 coding, the longitudinal HIV care continuum, a public health model, was used to guide coding (deductive  
132 codes) and organize themes [27]. The choice of these deductive themes, including HIV testing, linkage to  
133 HIV care and ART, and retention in ART care, were justified by their fundamental role in the HIV care  
134 continuum and their relevance to the experiences and challenges described by youth in the transcripts [17,  
135 27]. These themes provided a structured approach to analyzing the key issues in HIV prevention and  
136 treatment among young people.

137

138 The process of thematic analysis followed the Braun and Clarke's six-phase method to ensure a thorough  
139 and rigorous examination of the data [28]. Initially, we familiarized ourselves with the data by reading  
140 and re-reading the transcripts, making initial notes and observations. This was followed by generating  
141 initial codes from the data in a systematic fashion across the entire dataset, which involved identifying

142 significant features related to the research questions. These codes were then collated into potential  
143 themes, grouping related codes to reflect broader patterns of meaning. Next, we reviewed and refined  
144 these themes to ensure they accurately represented the data, checking if they worked in relation to the  
145 coded extracts and the entire dataset. Once themes were clearly defined, we named and described each  
146 theme, outlining their scope and focus. Finally, we produced a report that included detailed analysis of  
147 selected extracts, illustrating the themes and their relevance to the research questions. See Supporting File  
148 (S1 Table) for an overview of the themes and subthemes with sample supporting quotes.

149  
150 To maintain reliability and integrity of the analysis, we conducted the thematic analysis in the original  
151 languages of the transcripts, French and Arabic, before translating the results into English. This approach  
152 ensured that linguistic and cultural nuances were preserved and accurately reflected in the final analysis.

153  
154 Two care maps were created to represent the current pathways to care by HIV status (positive and  
155 negative) from the participatory group activity in the youth FGD, which explored decision making  
156 processes for participation (or not) in HIV services [29]. Figures 2A and 2B represent an aggregate of  
157 each FGD's care maps for HIV negative and positive youth, respectively. Within each figure, tables  
158 describe distinct healthcare resources at each step of care (S2-S3 Tables).

159  
160 ***Research trustworthiness***

161 To ensure the trustworthiness of the research, we adhered to the evaluative standards set forth by Lincoln  
162 and Guba (1985), which include credibility, transferability, dependability, and confirmability [30].  
163 Credibility was established through prolonged engagement with the data and participant verification. The  
164 involvement of locally trained data collectors who were familiar with the cultural context further  
165 enhanced the credibility of the data collection process. Transferability was facilitated by providing thick  
166 descriptions of the study context, participant demographics, and data collection methods, allowing readers

167 to assess the applicability of the findings to other contexts. Dependability was achieved by maintaining a  
168 detailed audit trail of the research process, including the steps taken during data collection, coding, and  
169 thematic analysis. Finally, confirmability was ensured through triangulation, peer debriefing, and  
170 maintaining a reflexive journal to document potential biases and how they were managed throughout the  
171 research process. Additionally, saturation was achieved at  $n = 12$  for youth and  $n = 9$  for service  
172 providers, as no new themes or insights emerged from the data. These measures collectively ensured that  
173 the findings are trustworthy and accurately represent the experiences of the participants.

174

### 175 *Reflexivity*

176 Reflexivity was a critical component of this study, given the complex sociocultural context of Chad. The  
177 research team, comprising individuals from diverse cultural and disciplinary backgrounds, engaged in  
178 continuous self-reflection to recognize and mitigate potential biases. As the Principal Investigator and a  
179 native of Chad, EB (first author), brought essential local knowledge and cultural sensitivity to the study,  
180 particularly regarding the complexity of Chad's healthcare system and socio-economic landscape.  
181 Additionally, the collaboration with the RNTAP<sup>+</sup>, composed entirely of Chadian nationals familiar with  
182 the local context and HIV, further ensured that the study was deeply rooted in the local reality. The team  
183 also included international researchers with extensive expertise in qualitative and HIV research, which  
184 guaranteed methodological rigor. The inclusion of locally trained interviewers who were proficient in the  
185 local languages and familiar with cultural nuances was essential in capturing authentic data. Regular team  
186 meetings were held to discuss and reflect on the data collection process, emerging themes, and any  
187 potential biases. The use of a reflexive journal allowed researchers to document their thoughts, decisions,  
188 and interactions with participants, which helped in maintaining an awareness of how their perspectives  
189 might influence the research. This reflexive practice ensured that the findings were grounded in the  
190 participants' realities rather than the researchers' preconceptions.

191

### 192 *Ethics approval*



193 Ethical considerations were paramount in this study, given the sensitive nature of the topic and the  
194 vulnerability of the adolescent participants. Ethical approval was obtained from both the Harvard T.H.  
195 Chan School of Public Health’s Institutional Review Board (IRB) protocol #IRB23-1743 and the National  
196 Committee on Bioethics of Chad (#010/MESRS/SE/SG/2024). Informed consent was obtained from all  
197 participants, with additional assent from guardians for participants who were younger than 18 years of  
198 age. The consent process involved reading the consent forms aloud and allowing participants to ask  
199 questions, ensuring they fully understood their participation rights and the study's purpose. To maintain  
200 confidentiality, pseudonyms were used, and all identifying information was removed from the transcripts.  
201 Data were securely stored, and only the research team had access to them. Additionally, the research  
202 design incorporated measures to minimize potential distress, such as the presence of same-gender  
203 interviewers for sensitive topics and providing participants with contact information for counseling  
204 services if needed. These ethical practices ensured the protection and well-being of the participants  
205 throughout the study.

206

## 207 **Results**

### 208 *Study characteristics*

209 Table 1 presents the demographics of the participants. A total of 23 focus group discussions were  
210 conducted with youth and service providers, including healthcare workers and community actors. Among  
211 youth, the study involved 23 HIV-positive and 29 HIV-negative participants. In addition, 48 service  
212 providers were divided into 3 groups, including 12 doctors, 12 nurses, and 24 community actors, mostly  
213 coming from public health facilities (79.2%). The findings consisted of 3 main themes and 10 subthemes:  
214 (1) HIV testing services, (2) linkage to HIV care and ART, and (3) retention on ART (Table 2).

215

216 **Table 1. Sample demographics for youth and service providers.**

217 **Table 2. Themes identified through focus group discussions with participants.**

218

219 Youth, whether HIV-negative individuals or those infected with HIV, face particular challenges accessing  
220 effective care and achieving successful treatment outcomes. Fig 1 shows HIV care pathways. This was  
221 used to guide the organization and discussion of the generation of themes. Fig 1 has 3 different  
222 components, including the (1) UNAIDS HIV/AIDS targets for 2030, (2) system successes, and (3) system  
223 failures. The targets for 2030 can be read as follows: 95% of people living with HIV know their HIV  
224 status, of which (blue arrow), 95% receive treatment, of which (pink arrow), 95% are virally suppressed.  
225 To achieve the global 95-95-95 goals, adopted by United Nations Member States in June 2021, it would  
226 require system successes [31-33]. When an adolescent is tested for HIV, two cases can happen: if  
227 negative, then this adolescent is linked to counseling and HIV prevention services, including behavioral  
228 and/or biomedical strategies. However, if positive, the adolescent follows the HIV care continuum.  
229 Finally, the third component showcases the system failures due to challenges at different levels,  
230 extensively discussed throughout the manuscript.

231

232 **Fig 1. Overall adolescent-focused HIV pathway to care in Chad.**

233

234 Figures 2A and 2B depict the care pathways for HIV-negative and HIV-positive youth in Chad,  
235 respectively. For HIV-negative youth, the journey begins at the household level and progresses through  
236 public health centers, hospitals, and pharmacies, with occasional visits to traditional healers and  
237 charlatans. This reflects the blend of traditional and modern healthcare practices in Chad. As youth move  
238 through these steps, they may repeatedly visit public health centers and hospitals, highlighting the  
239 iterative nature of healthcare-seeking and the need for specialized care at higher-level facilities. This  
240 pathway illustrates the complex navigation required within the healthcare system for HIV-negative youth.  
241 For HIV-positive youth, the process starts with HIV testing at various institutions, followed by diagnosis  
242 and linkage to care through military, public, NGO, and religious facilities. The retention in care phase  
243 involves specialized social clubs and multiple public health institutions.

244

245 **Fig 2. The current pathways to care experienced by A) HIV-negative and B) HIV-positive youth.**

246

247 Theme 1: HIV testing services

248 *Subtheme 1: Accessibility of testing*

249 Youth's access to HIV testing was a critical factor in their engagement with SRH services. Accessibility  
250 encompassed the availability of testing facilities, the cost of tests, and the proximity of these centers to  
251 their homes or schools. One adolescent described their experience, saying "*I was tested for HIV five*  
252 *months ago at the BABA Moustapha cultural center. It was part of a workshop. Accessing the service was*  
253 *very simple*" (Participant #11, age range 22-24 years). Despite these examples of easy access, the  
254 financial aspect remained a barrier for many, as highlighted by another adolescent who noted the high  
255 costs associated with hospital visits and the need to seek more affordable options like pharmacies.  
256 Furthermore, the lack of free additional testing as healthcare often required multiple screenings were not  
257 always covered, making it financially burdensome for youth. For instance, an adolescent shared, "*Going*  
258 *to the hospital for tests costs a lot of money. We young people are looking for shortcuts like going to the*  
259 *pharmacy, which is less expensive*" (Participant 4, age range 20-22 years). Another mentioned,  
260 "*Hospitals are expensive for examinations and due to the lack of resources, we can't do them. If rates*  
261 *can be reduced for us young people, it would be good because we don't have the financial means*"  
262 (Participant #1, age range 20-22 years). These challenges were compounded by issues like reagent  
263 shortages, which limited the availability of necessary tests, as noted by a community actor: "*On the*  
264 *financial side: access is voluntary; however, we are dealing with reagent shortages, and this has been the*  
265 *case since August 2023 except for pregnant women (prioritized)*" (Community actor, FGD #1).

266

267 Youth approached HIV testing influenced by various factors, including family, social environment, and  
268 personal health experiences, navigating fragmented care pathways across multiple healthcare sectors (Fig  
269 2). Regular testing for HIV was mentioned as a common practice among HIV-negative youth, often

270 driven by personal or parental initiative, which highlighted the importance of early detection and periodic  
271 testing after risky behaviors such as “*unprotected sex*” (Participant #34, age range 18-19 years). Many  
272 youths relied on health centers, hospitals, school programs, family referrals, and health campaigns for  
273 testing. For instance, one adolescent shared, “*I am taken by my [parent] for testing. After testing, we went*  
274 *home, and he came back to get the results*” (Participant #26, age range 18-19 years). Similarly, others  
275 described straightforward access to testing through school campaigns and cultural center workshops.  
276 Healthcare workers and community actors have played pivotal roles in facilitating access to these  
277 services. For example, community actors mediated between young people and healthcare facilities,  
278 providing information and support to navigate the testing process: “*My role is to help, accompany, and*  
279 *guide them. In my opinion, it is important to raise awareness in churches, schools, and in the*  
280 *neighborhood*” (Community actor, FGD #2). Besides biomedical strategies, behavioral HIV preventive  
281 interventions were also employed since service providers offered advice and counseling to HIV-negative  
282 youth. Youth reported receiving advice from “*psycho-social counselors, attending physicians*”  
283 (Participant #27, age range 18-19 years), and noted that these providers are key sources of information  
284 and support.

285

#### 286 *Subtheme 2: Awareness and knowledge*

287 The level of awareness and knowledge about HIV testing among youth significantly influenced their  
288 likelihood of getting tested. Youth gathered information from various sources, including “*associations*  
289 *working to combat sexually transmitted diseases*” (Participant #9, age range 15-17 years), “*social*  
290 *networks and educational institutions*” (Participant #23, age range 20-22 years). These sources provided  
291 crucial information about where and how to get tested, the importance of regular testing, and  
292 understanding the implications of the test results. Some youth received referrals from family members,  
293 while others took the initiative to seek testing due to health concerns: “*I did not feel well and went*  
294 *straight to the hospital for testing because I did not want to suffer. The fear of dying was great. I took the*  
295 *test and when I found out it was negative, it prompted me to take preventive measures in the future*”

296 (Participant #4, age range 20-22 years). However, misconceptions and a lack of comprehensive  
297 knowledge deterred youth from seeking testing. For instance, one adolescent mentioned, “*Some people*  
298 *think that once you take the test, you will get infected*” (Participant #2, age range 18-19 years). Another  
299 added, “*I thought you could only get tested if you were already sick*” (Participant #1, age range 20-22  
300 years). Healthcare workers were instrumental in educating and advising youth about the importance of  
301 regular testing and HIV prevention.

302

### 303 *Subtheme 3: Psychological barriers*

304 Psychological barriers played a significant role in youth’s decision-making regarding HIV testing.  
305 Adolescent females often faced higher barriers to accessing HIV testing due to societal norms and stigma  
306 associated with sexual health. Females were more likely to encounter negative reactions from healthcare  
307 providers and fear of judgement, which discouraged them from seeking testing. As one community actor  
308 noted, “*The obstacle is the lack of confidentiality*” and “*family presence is required*” (Community actor,  
309 FGD #2). Additionally, some adolescent girls reported being coerced into testing by their parents,  
310 sometimes without fully understanding the process or its implications. A healthcare worker mentioned,  
311 “*When a teenager presents (always accompanied), if the doctor refers them to us for screening, the child*  
312 *is isolated from the parents to find out if sexual intercourse was protected or not*” (Healthcare worker,  
313 FGD #1). In contrast, adolescent males experienced less societal pressure but still faced significant  
314 obstacles. Many young men reported challenges related to the convenience of testing facilities and the  
315 fear of receiving their status, which deterred them from seeking testing. An adolescent shared, “*It’s not*  
316 *easy. For us students, we have to be on vacation and every time we take the test, we are afraid of being*  
317 *positive*” (Participant #3, age range 22-24 years). This fear could be overwhelming and prevent youth  
318 from getting tested, even when they recognized the importance of knowing their status. Despite the fear  
319 and stigma associated with HIV testing, some youth still found the courage to get tested, driven by risky  
320 behaviors or symptoms, as expressed by: “*The fear is there, but you have to have the strength to go and*  
321 *take the test*” (Participant #3, age range 22-24 years) or “*I do not think it’s easy. You have to be brave.*

322 *The first day I refused, but once I made love with someone I did not know without protection, I had to find*  
323 *the courage to take the test” (Participant #2, age range 18-19 years). Addressing these psychological*  
324 *barriers requires creating a supportive and non-judgmental testing environment, providing counseling*  
325 *services to help youth cope with their fears, and normalizing HIV testing as a routine part of healthcare.*  
326 *Healthcare workers and community actors contributed significantly by providing reassurance where youth*  
327 *felt safe and supported during the testing process, as expressed by: We the psychosocial counselors*  
328 *mediate between young people and the hospital. There are young people who lack information, and some*  
329 *are trying to access these services. So, we are the hyphen, we give them the information” (Community*  
330 *actor, FGD #1).*

331  
332 *Subtheme 4: Support systems*  
333 *Support systems, including family members, peers, and healthcare providers, were crucial in encouraging*  
334 *youth to undergo HIV testing. The presence of a supportive environment can significantly reduce the fear*  
335 *and stigma associated with testing. For example, one adolescent mentioned, “My [relative] is a nurse so I*  
336 *ask her to take me to the hospital” (Participant #1, age range 20-22 years), illustrating the importance of*  
337 *having trusted individuals who can facilitate access to testing (Fig 2). Additionally, schools and*  
338 *community organizations played a vital role in providing information and support, helping to create a*  
339 *culture where HIV testing was seen as a responsible and routine health behavior. For HIV-positive youth,*  
340 *diagnoses often occurred during routine medical visits or emergencies prompted by recurrent illnesses or*  
341 *family-initiated tests (Fig 2). An adolescent recounted, “I had pimples on my body and my [parent] took*  
342 *me to the hospital and after the test, I was diagnosed with HIV” (Participant #50, age range 15-17 years).*  
343 *Many discovered their status through parental intervention, such as Participant #33 who was screened by*  
344 *their parent, or Participant #32, who was screened due to frequent illnesses. Youth also encountered*  
345 *diagnoses in unexpected medical contexts, like Participant #30, who tested positive during additional tests*  
346 *following surgery. Table 3 shows selected quotes from HIV-positive youth.*

347

348 **Table 3. Quotes from HIV-positive youth on diagnoses following HIV testing with family support.**

349  
350 Service providers have been crucial in offering continuous support and follow-up, ensuring that youth  
351 remained engaged with the healthcare system. Strengthening these support systems by involving families,  
352 peers, and community leaders can enhance youth’s willingness to get tested and ensure they receive the  
353 necessary support throughout the process. Thus, while these barriers were significant, the support systems  
354 and personal determination of youth played crucial roles in their decision to undergo HIV testing.

355  
356 Theme 2: Linkage to HIV care and ART

357 *Subtheme 1: Referral processes*

358 This process was shaped by various factors, from initial referral processes to the barriers and facilitators  
359 youth encountered. Effective referrals and supportive healthcare professionals were crucial in helping  
360 youth transition from testing to treatment. For instance, one adolescent recounted, “*The psychosocial*  
361 *counselor gave me advice, which helped me to accept treatment*” (Participant #44, age range 20-22  
362 years). Healthcare workers played a vital role in this stage by providing clear guidance and support,  
363 ensuring that youth understood the importance of immediate engagement with care, as expressed by, “*It’s*  
364 *not the end of the world. You are going to take ARTs and be like other kids. You should come in for the*  
365 *viral load tests in 3-4 months, so if it’s undetectable, you can’t transmit the virus to another person*  
366 *anymore, and you are going to do whatever other people do too*” (Healthcare worker, FGD #2).

367  
368 *Subtheme 2: Initial engagement*

369 Youth’s first experiences with HIV care were important in determining their long-term engagement with  
370 treatment. Positive initial interactions with healthcare providers could significantly influence their  
371 decisions to seek care post-diagnosis. One adolescent highlighted this importance, saying, “*It’s difficult at*  
372 *first, but once trust is established between the patient and doctor, everything becomes easy*” (Participant



373 #37, age range 22-24 years). Healthcare workers often provided emotional support and reassurance during  
374 this critical period. For example, one healthcare worker mentioned, *“My role is to see the adolescent*  
375 *living with HIV with a smile. It’s very important for me to listen, advise, guide, and lead the person to*  
376 *access his diagnosis”* (Healthcare worker, FGD #3). Additionally, a community health worker said,  
377 *“When they learn that they are infected they believe that life is over. But when we tell them that with*  
378 *treatment, they will have HIV-negative children and then, they find hope again”* (Community actor, FGD  
379 #1). This supportive approach helped youth overcome initial fears and uncertainties about treatment.

380  
381 However, despite these efforts, youth faced significant barriers to linkage to HIV care and ART. Financial  
382 constraints were a major obstacle, as noted by an adolescent who said, *“I have no money to pay for*  
383 *medication”* (Participant #44, age range 20-22 years). Due to this situation, some youths were forced to  
384 seek non-traditional care options such as charlatans and traditional healers, further endangering their  
385 health conditions (Fig 2). Logistical challenges, such as transportation issues and the fear of stigma, also  
386 hindered effective linkage. Community actors highlighted the importance of confidentiality and trust, with  
387 one noting, *“Dealing with teenagers is difficult and there needs to be an emphasis on confidentiality”*  
388 (Community actor, FGD #1). Some youth found it easier to discuss their health with community actors  
389 such as peers rather than healthcare workers due to the perceived lack of confidentiality. This was further  
390 discussed by a healthcare worker who noted, *“Youth often fear the judgment and lack of confidentiality*  
391 *from healthcare workers”* (Healthcare worker, FDG #1). A community actor explained, *“These youth are*  
392 *not wrong because some youths are not kind and expose children”* (Community actor, FGD #1), which  
393 emphasized the need to create a supportive and stigma-free healthcare environment.

394  
395 *Subtheme 3: Facilitators of linkage*  
396 Youth’s preferences for certain facilities over others, despite geographic proximity, were influenced by  
397 several factors. They often favored specialized HIV health facilities and social clubs over public hospitals  
398 due to the quality of care, the reception, and the supportive environment provided. As one adolescent



399 noted, in specialized establishments, *"care is assured and their products are effective because they are*  
400 *subsidized"* whereas in public hospitals, *"care is not total and the welcome is not as good"* (Participant  
401 #26, age range 18-19 years). Specialized facilities and social clubs were perceived to offer more  
402 comprehensive and empathetic care, free from stigma and discrimination, which was crucial for youth  
403 managing sensitive health issues like HIV. This sentiment was echoed by another adolescent who  
404 mentioned that in clubs, *"we feel good"* (Participant #45, age range 20-22 years) whereas in public  
405 hospitals, the staff sometimes *"neglect and stigmatize us"* (Participant #44, age range 20-22 years).

406  
407 Additionally, the availability of trained staff, confidentiality, and effective communication in specialized  
408 centers contributed to youth's preferences. Social clubs, in particular, offer a space for open dialogue and  
409 guidance, making them attractive to young people seeking both medical and psychosocial support. As one  
410 adolescent described, *"we share everything in words; they encourage us to go to the hospital to get tested*  
411 *and to use the services"* (Participant #4, age range 20-22 years). These facilities also provided a sense of  
412 community and emotional support, which public hospitals often lack. Although healthcare workers  
413 emphasized the need for continuous education and support, with one stating, *"We must advise them and*  
414 *support them as much as possible"* (Healthcare worker, FGD #2), the specialized facilities and social  
415 clubs stood out because they offered tailored environments that prioritized confidentiality, empathy, and  
416 comprehensive care. This combination of factors made them particularly appealing to youth who required  
417 both medical and psychosocial support in managing their health.

418

419 Theme 3: Retention in ART care

420 *Subtheme 1: Adherence to treatment*

421 Youth's commitment to staying on ART was often influenced by their understanding on the importance  
422 of consistent medication intake and managing side effects. One adolescent expressed their determination,  
423 stating, *"I agreed to continue ART to avoid transmitting HIV to others and to stay healthy"* (Participant

424 #50, age range 15-17 years). Healthcare workers played a crucial role in this process by providing clear  
425 and consistent information about the benefits of adherence and helping manage any side effects that may  
426 arise. For example, a healthcare worker noted the importance of therapeutic education, stating, *“It is*  
427 *important to remain clear about the examples of therapeutic education”* (Healthcare worker, FGD #3).  
428 This clarity helped youth understand the critical nature of their treatment regimen and reinforced their  
429 commitment to maintaining it.

430

#### 431 *Subtheme 2: Continuous engagement*

432 Retention in ART care also involved regular follow-ups with healthcare providers and continuous  
433 engagement with healthcare services. Frequent interactions with healthcare providers helped reinforce the  
434 importance of adherence and provide ongoing support. One adolescent reflected on their routine,  
435 mentioning, *“When you feel like you're taking a risk during sexual intercourse, you must be aware and*  
436 *take precautions, including regular follow-ups and adherence to ART”* (Participant #34, age range 18-19  
437 years), illustrating the continuous engagement needed. Healthcare workers emphasized the need to spend  
438 adequate time with patients to build trust and ensure they understand their treatment. One healthcare  
439 worker stated, *“The patient must always have a little bit of time with the doctor after the first consultation*  
440 *because he is the one who accompanies him through the process”* (Healthcare worker, FGD #4). This  
441 ongoing relationship between healthcare providers and youth is essential for maintaining adherence and  
442 addressing any issues that may arise during treatment.

443

#### 444 *Subtheme 3: Retention challenges and support strategies*

445 In previous steps of the HIV care continuum, barriers such as stigma, financial constraints and logistical  
446 challenges were identified for HIV testing as well as during the process of linkage to HIV care and ART,  
447 respectively. Despite the support from healthcare providers, financial difficulties, transportation issues,  
448 and experiences of stigma or discrimination further hindered retention in ART care (Fig 2). For example,  
449 logistical issues such as transportation made regular clinic visits challenging. One adolescent shared, *“It’s*

450 *difficult to access care because of travel*" (Participant #34, age range 18-19 years). Another example  
451 involved a teenager who preferred to travel a longer distance to a different health center to avoid stigma,  
452 *"There is this teenager who lives in a [city] and prefers to go to a health center in [another city] for the*  
453 *pills despite the referral proposal I made to him and this for the simple reason that his [relative] works at*  
454 *this health center close to him"* (Community actor, FGD #1). Youth have advocated for tailored services  
455 to address these challenges, expressing a desire for services that cater specifically to their needs, including  
456 tailored hours that accommodate their schedules. For instance, one adolescent suggested, *"We need*  
457 *special centers for teenagers to make them feel comfortable, with hours that fit our school and work*  
458 *schedules"* (Participant #8, age range 15-17 years). This sentiment was echoed by community actors who  
459 recognized the need for flexible service hours: *"It would be important to create special structures with*  
460 *everything in it, including tailored hours that allow youth to access care without disrupting their daily*  
461 *routines"* (Community actor, FGD #1).

462  
463 Youth often stopped treatment when they started feeling better, which disrupted their long-term care.  
464 Healthcare workers have responded to these needs by providing longer drug stocks to youth who have  
465 earned their trust, which helps to maintain continuity in their treatment. One community actor explained,  
466 *"We call them (by phone) if they don't keep the appointments. We're going to pick them up (move). At*  
467 *first, they are put on ARVs and when they get better, they leave and only come back when there is a*  
468 *complication"* (Community actor, FGD #1). Another one shared, *"When we gain their trust and they*  
469 *become more attached to us than their own parents, we can trust them with 3 to 6 months of drug stocks"*  
470 (Community actor, FGD #1). This approach not only addressed the logistical challenges but also helped  
471 ensure that youth remain engaged in their ART regimen.

472  
473 **Discussion**  
474 Findings from this study highlight the significant barriers and facilitators in the HIV care continuum for  
475 youth in Chad. The ideal pathway to SRH and HIV care for youth necessitates an adolescent-centered

476 design that prioritizes customized accessibility, responsiveness of care, clinical effectiveness, and tailored  
477 service delivery. This approach would significantly improve the HIV care continuum, including HIV  
478 testing, linkage to care, and retention in care, by addressing the unique needs and challenges faced by  
479 youth.

480  
481 Accessibility remains a fundamental barrier to HIV testing and care for youth. Our study revealed gender  
482 disparities, especially among adolescent females facing higher barriers to accessing HIV testing due to  
483 societal norms and stigma. However, adolescent males faced barriers related to the convenience of testing  
484 facilities and the fear of receiving a positive status. Like other studies, stigma was also identified as a  
485 main barrier to care and treatment adherence among youth living with HIV in many settings in sub-  
486 Saharan Africa [4, 34-36]. Youth further emphasized the importance of integrating testing services into  
487 familiar and convenient locations, especially due to stigma. Integrating HIV testing into a multi-disease  
488 approach, as suggested by youth has been shown to increase efficiency while reducing stigma in SSA,  
489 especially among men [37, 38]. Financial and logistical barriers significantly hindered youth's access to  
490 HIV testing and care services. Many youth face challenges such as high transportation costs, long travel  
491 distances, and limited availability of specialized HIV care facilities. To address these issues, youth and  
492 service providers suggested the establishment of more adolescent-specific centers in close proximity.  
493 These centers should be strategically located to minimize travel distances and associated costs, making it  
494 easier for youth to access the services they need. By reducing financial and logistical barriers, and  
495 providing services within their communities, these centers can play a pivotal role in improving HIV care  
496 engagement and outcomes for youth.

497  
498 The responsiveness of care is crucial for maintaining youth's engagement in HIV services. Youth  
499 reported that negative interactions with healthcare providers, long waiting times, and lack of  
500 confidentiality deterred them from seeking and continuing care. Similar challenges have been reported by  
501 studies, highlighting these health-system and structural barriers, further complicating youth's engagement

502 in HIV care. However, solutions exist that can mitigate these challenges. Building on the creation of  
503 specific centers for youth, these spaces need to be safe and supportive environments, delivering screening  
504 services, psychosocial support, and adhering to adolescent-specific treatment protocols. Additionally,  
505 youth highlighted the need for healthcare providers to be more understanding and respectful, which can  
506 be facilitated through targeted training programs for healthcare workers on adolescent-friendly practices.  
507 Research has shown that engaging youth in the design of HIV care interventions significantly enhances  
508 their engagement and acceptance of services. Furthermore, Akama et al. (2023) demonstrated that youth-  
509 led initiatives can improve care engagement by making services more responsive to youth's needs [39].

510  
511 Ensuring clinical effectiveness involves providing comprehensive and continuous care tailored to the  
512 specific needs of youth. Continuous, and specialized training for healthcare workers is crucial, especially  
513 in how to deliver adolescent-specific services. This training should focus on developing skills in  
514 communication, confidentiality, and the management of adolescent health issues to ensure that healthcare  
515 providers can offer empathetic, respectful, and effective care. Recent research has demonstrated the  
516 effectiveness of such approaches in improving linkage to and retention in care [40, 41]. Furthermore, in  
517 adolescent-centered design, the care provided is based on the best available evidence and is specifically  
518 tailored to the unique developmental and psychosocial aspects of adolescent health. This involves using  
519 interventions that have been proven effective for this age group and ensuring that healthcare providers are  
520 trained in adolescent health dynamics. Clinical effectiveness is enhanced by continuity of care and by  
521 integrating feedback from youth to improve and adapt clinical practices and treatment protocols. For  
522 instance, studies have shown that youth-friendly service models and human-centered design approaches  
523 significantly improve linkage to care and retention rates among youth [42, 43].

524  
525 Finally, tailored service delivery requires a holistic approach that integrates biomedical, behavioral,  
526 psychosocial, and structural perspectives. Youth emphasized the positive impact of having peer educators  
527 and psycho-social counselors who provided both information and emotional support, making the

528 healthcare experience more relatable and less intimidating. Recent research supports this integrated  
529 approach, showing that peer-led interventions and the inclusion of psycho-social support within youth-  
530 friendly spaces significantly improve access and engagement, as well as enhance linkage to care and  
531 retention rates among youth [42-46]. Additionally, service providers advocated for the development of  
532 community-based programs that involve family and community leaders to reduce stigma and support  
533 youth's adherence to treatment. For example, Willis et al. (2019) demonstrated that interventions  
534 involving community adolescent treatment supporters (CATS) significantly improved adherence,  
535 retention, and psychosocial well-being among HIV-positive youth in Zimbabwe [47]. Further studies  
536 have shown that these community-based and multi-faceted interventions are crucial in addressing the  
537 complex needs of youth and improving their overall engagement in HIV care [48]. By incorporating these  
538 strategies, healthcare systems can create a more supportive and effective environment that promotes better  
539 health outcomes for youth.

540  
541 Despite the valuable insights gained from this study, several limitations should be acknowledged.  
542 Although the study involved 23 FGDs with a diverse sample of youth and service providers, the  
543 participants were recruited from specific regions and contexts, which may not fully represent the broader  
544 adolescent population in Chad or similar settings. Future research should consider expanding the  
545 geographic scope to include rural areas and other provinces to capture a wider range of experiences and  
546 perspectives. Second, the reliance on self-reported data presents a potential bias, as participants might  
547 have provided socially desirable responses or may not accurately recall their experiences related to HIV  
548 care and ART. This could lead to an underestimation or overestimation of certain barriers or facilitators  
549 discussed during the FGDs. Triangulating self-reported data with observations could enhance the  
550 reliability of the findings. Third, language and translation issues pose another limitation. While the  
551 thematic analysis was conducted in the original languages (French and Arabic) to preserve linguistic and  
552 cultural nuances, the subsequent translation into English might have resulted in subtle shifts in meaning  
553 or loss of context. Lastly, the study's cross-sectional design captures a snapshot of participants'

554 experiences at a single point in time, limiting the ability to observe changes over time or assess long-term  
555 outcomes related to HIV care and ART adherence. Prospective qualitative studies would be beneficial in  
556 understanding how experiences and challenges faced by youth evolve over time.

557

## 558 **Conclusion**

559 Significant progress toward ending the HIV epidemic among youth requires redesigning healthcare  
560 services in Chad to be more adolescent-friendly and responsive to their specific needs. This involves  
561 integrating biomedical, behavioral, psychosocial, and structural perspectives into a comprehensive  
562 approach to HIV care. Tailored interventions focused on reducing stigma, enhancing accessibility, and  
563 providing continuous psychosocial support are essential. Continuous research and collaboration with local  
564 communities and stakeholders are crucial to developing effective strategies that support youth in  
565 navigating the healthcare system and achieving better health outcomes.

566

## 567 **Acknowledgments**

568 We are grateful for the collaboration and support received from the Blue Cross Chad, Rose Service-  
569 Learning Fellowship, Fostering Diversity in HIV Research Program, Tessa Jowell Fellowship for  
570 Doctoral Research, Gamble Scholarship, and Chad's Prime Minister's Office. We thank the study  
571 participations for their willingness to share their experiences and perspectives, which has provided an  
572 essential foundation for our research. The study received funding from the Tessa Jowell Fellowship for  
573 Doctoral Research and Chad's Prime Minister's Office.

574

## 575 **Abbreviations**

576 ART = antiretroviral therapy

577 AIDS = acquired immunodeficiency syndrome

578 CDC = Centers for Disease Control and Prevention

579 CGT = constructivist grounded theory

580 CNLS = National AIDS Control Council  
581 DHS = demographic and health surveys  
582 FCAS = fragile and conflict-affected settings  
583 FGD = focus group discussion  
584 HIV = human immunodeficiency virus  
585 LGBTQ+ = lesbian, gay, bisexual, transgender, and questioning (or queer)  
586 NGO = non-governmental organization  
587 PAR = participatory action research  
588 RNTAP+ = National Executive Secretary of the Chadian National Network of Associations of People  
589 Living with HIV  
590 SRH = sexual and reproductive health  
591 SSA = Sub-Saharan Africa  
592 UN = United Nations  
593 UNAIDS = Joint United Nations Programme on HIV/AIDS  
594 UNICEF = United Nations International Children’s Emergency Fund  
595 WHO = World Health Organization  
596 YLHIV = youth living with HIV

597

598 **Data availability statement**

599 The data underlying this article cannot be shared publicly due to ethical restrictions. When applying for  
600 ethical approval, we did not specify that the data would be made publicly available in a repository. As  
601 part of the written and verbal consent, we assured participants that all data would be confidential and  
602 access to the recordings would be restricted to the research team. We did specify that “some of their  
603 words” may be used in reporting the findings of the study (which we have done within the manuscript as  
604 non-identifiable quotes), however, to make all raw data publicly available will be a serious breach to the  
605 rights of ethical of participants given did not consent to this.



606

607 **References**

- 608 1. UNAIDS. Youth and HIV: Mainstreaming a three-lens approach to youth participation. 2018.  
609 Available from : [https://www.unaids.org/sites/default/files/media\\_asset/youth-and-hiv\\_en.pdf](https://www.unaids.org/sites/default/files/media_asset/youth-and-hiv_en.pdf)
- 610 2. UNAIDS. Young people and HIV. 2021. Available  
611 from: [https://www.unaids.org/sites/default/files/media\\_asset/young-people-and-hiv\\_en.pdf](https://www.unaids.org/sites/default/files/media_asset/young-people-and-hiv_en.pdf)
- 612 3. UNICEF. Adolescents HIV prevention. 2023. Available from :  
613 <https://data.unicef.org/topic/hivaids/adolescents-young-people/>
- 614 4. Kim SH, Gerver SM, Fidler S, Ward H. Adherence to antiretroviral therapy in adolescents living with  
615 HIV systematic review and meta-analysis. AIDS. 2014;28(13):1945-1956.  
616 doi:10.1097/QAD.0000000000000316
- 617 5. Slogrove AL, Sohn AH. The global epidemiology of adolescents living with HIV: time for a more  
618 granular data to improve adolescent health outcomes. Curr Opin HIV AIDS. 2018;13(3):170-178.  
619 doi:10.1097/COH.0000000000000449
- 620 6. Idele P, Gillespie A, Porth T, Sukuzi C, Mahy M, Kasedde S, et al. Epidemiology of HIV and AIDS  
621 among adolescents: current status inequities and data gaps. J Acquir Immune Defic Syndr.  
622 2014;66(Suppl 2) doi:10.1097/QAI.0000000000000176
- 623 7. UNAIDS. The Gap Report. 2014. ISBN: 978-92-9253-062-4.
- 624 8. UNAIDS. The path that ends AIDS: 2023 UNAIDS Global AIDS Update. 2023. Available  
625 from: <https://thepath.unaids.org>
- 626 9. Kharsany ABM, Karim QA. HIV infections and AIDS in Sub-Saharan Africa: current status  
627 challenges and opportunities. Open AIDS J. 2016;10:34-48. doi:10.2174/1874613601610010034
- 628 10. Chad Demographic and Health Surveys: HIV Prevalence. The DHS Program website. Funded by  
629 USAID. Available from: <https://www.dhsprogram.com>
- 630 11. Global Communities. Ending the “Triple Threat” of early pregnancies, new HIV infections and sexual  
631 violence among adolescent girls & young women. <https://globalcommunities.org/blog/ending-the->

- 632 [triple-threat-of-early-pregnancies-new-hiv-infections-and-sexual-violence-among-adolescent-girls-](#)  
633 [and-young-women/](#)
- 634 12. UNICEF. HIV/Aids. 2019. Available from: <https://www.unicef.org/chad/hiv aids>
- 635 13. Enane LA, Apondi E, Toromo J, Bosma C, Ngeresa A, Nyandiko W, et al. “A problem shared is half  
636 solved” – a qualitative assessment of barriers and facilitators to adolescent retention in HIV care in  
637 western Kenya. *AIDS Care*. 2019;32(1):104-112. doi:10.1080/09540121.2019.1668530
- 638 14. Mengesha MM, Teshome A, Ajema D, Tura AK, Hallström IK, Jerene D. The association between  
639 HIV diagnosis disclosure and adherence to anti-retroviral therapy among adolescents living with HIV  
640 in Sub-Saharan Africa: A systematic review and meta-analysis. *PLOS ONE*. 2023;18(5)  
641 doi:10.1371/journal.pone.0285571
- 642 15. Hudelson C, Cluver L. Factors associated with adherence to antiretroviral therapy among adolescents  
643 living with HIV/AIDS in low- and middle-income countries: a systematic review. *AIDS Care*.  
644 2015;27:805-816. doi:10.1080/09540121.2015.1011073
- 645 16. Tarantino N, Lowery A, Brown LK. Adherence to HIV care and associated health functioning among  
646 youth living with HIV in Sub-Saharan Africa. *AIDS Rev*. 2020;22(2):93-102.  
647 doi:10.24875/AIDSRev.20000101
- 648 17. MacPherson P, Munthali C, Ferguson J, Armstrong A, Kranzer K, Ferrand RA, et al. Service delivery  
649 interventions to improve adolescents’ linkage retention and adherence to antiretroviral therapy and  
650 HIV care. *Trop Med Int Health*. 2015;20(8):1015-1032. doi:10.1111/tmi.12517
- 651 18. Fox MP, Rosen S. Systematic review of retention of pediatric patients on HIV treatment in low and  
652 middle-income countries 2008-2013. *AIDS*. 2015;29:493-502. doi:10.1097/QAD.0000000000000559
- 653 19. Munyayi FK, van Wyk B, Mayman Y. Interventions to improve treatment outcomes among  
654 adolescents on antiretroviral therapy with unsuppressed viral loads: A systematic review. *Int J*  
655 *Environ Res Public Health*. 2022;19(7):3940. doi:10.3390/ijerph19073940

- 656 20. Murray KR, Dulli LS, Ridgeway K, Dal Santo L, Darrow de Mora D, Olsen P, et al. Improving  
657 retention in HIV care among adolescents and adults in low- and middle-income countries: A  
658 systematic review of the literature. PLOS ONE. 2017;12(9) doi:10.1371/journal.pone.0184879  
659 21. Charmaz K. “Discovering” chronic illness: Using grounded theory. Soc Sci Med. 1990;30:1161-  
660 1172.
- 661 22. Charmaz K. Grounded theory: Objectivist and constructivist methods. In: Denzin NK, Lincoln YS,  
662 editors. Handbook of qualitative research. 2nd ed. London: Sage; 2000.
- 663 23. Conseil National de Lutte contre le SIDA [CNLS]. Plan stratégique de riposte au SIDA 2018-2022  
664 étendu à 2025. 2021.
- 665 24. Amsden J, VanWynsberghe R, et al. Community mapping as a research tool with youth. Action  
666 Research. 2005;3(4) doi:10.1177/1476750305058487
- 667 25. Scientific Software Development GmbH. Atlas.ti 7.5.6. ed. Berlin: Scientific Software Development  
668 GmbH; 2016.
- 669 26. Patton MQ. Qualitative research & evaluation methods: Integrating theory and practice. 4th ed.  
670 Thousand Oaks, CA: Sage; 2015.
- 671 27. Herce ME, Chi BH, Liao RC, Hoffman CJ. Re-thinking linkage to care in the era of universal test and  
672 treat: Insights from implementation and behavioral science for achieving the second 90. AIDS Behav.  
673 2019;23:120-128. doi:10.1007/s10461-019-02541-5
- 674 28. Braun V, Clarke V. Using thematic analysis in psychology. Qual Res Psychol. 2006;3(2):77-101.  
675 doi:10.1191/1478088706qp063oa
- 676 29. Chary AN, Nandi M, Flood D, Tschida S, Wilcox K, Kurschner S, et al. Qualitative study of  
677 pathways to care among adults with diabetes in rural Guatemala. BMJ Open. 2023;13  
678 doi:10.1136/bmjopen-2021-056913
- 679 30. Lincoln YS, Guba EG. Naturalistic Inquiry. Beverly Hills, CA: Sage Publications Inc.; 1985.  
680 doi:10.1016/0147-1767(85)90062-8

- 681 31. Frescura L, Godfrey-Faussett P, Feizzadeh AA, El-Sadr W, Syarif O, Ghys PD, on and behalf of the  
682 2025 testing treatment target Working Group. Achieving the 95 95 95 targets for all: A pathway to  
683 ending AIDS. PLOS ONE. 2022;17(8). doi:10.1371/journal.pone.0272405
- 684 32. Heath K, Levi J, Hill A. The Joint United Nations Programme on HIV/AIDS 95-95-95 targets:  
685 worldwide clinical and cost benefits of generic manufacture. AIDS. 2021;35(Suppl 2).  
686 doi:10.1097/QAD.0000000000002983
- 687 33. UNAIDS. Understanding measures of progress towards the 95-95-95 HIV testing treatment and viral  
688 suppression targets. 2023b. Available  
689 from: [https://www.unaids.org/sites/default/files/media\\_asset/progress-towards-95-95-95\\_en.pdf](https://www.unaids.org/sites/default/files/media_asset/progress-towards-95-95-95_en.pdf)
- 690 34. Ammon N, Mason S, Corkery JM. Factors impacting antiretroviral therapy adherence among human  
691 immunodeficiency virus-positive adolescents in Sub-Saharan Africa: a systematic review. Public  
692 Health. 2018;157:20-31. doi:10.1016/j.puhe.2017.12.010
- 693 35. Audi C, Jahanpour O, Antelman G, Guay L, Rutaihwa M, van de Ven R, et al. Facilitators and  
694 barriers to antiretroviral therapy adherence among HIV-positive adolescents living in Tanzania. BMC  
695 Public Health. 2021;21:2274. doi:10.1186/s12889-021-12323-1
- 696 36. Madiba S, Josiah U. Perceived stigma and fear of unintended disclosure are barriers in medication  
697 adherence in adolescents with perinatal HIV in Botswana: A qualitative study. Biomed Res Int.  
698 2019;2019:9623159. doi:10.1155/2019/9623159
- 699 37. Lugada E, Levin J, Abang B, Mermin J, Mugalanzi E, Namara G, et al. Comparison of home and  
700 clinic-based HIV testing among household members of persons taking antiretroviral therapy in  
701 Uganda: Results from a randomized trial. J Acquir Immune Defic Syndr. 2010;55(2):245-252.  
702 doi:10.1097/QAI.0b013e3181e9e069
- 703 38. Sharma A, Wang LY, Dunville R, Valencia RK, Rosenberg ES, Sullivan PS. HIV and sexually  
704 transmitted disease testing behavior among adolescent sexual minority males: Analysis of pooled  
705 youth risk behavior survey data 2005-2013. LGBT Health. 2017;4(2). doi:10.1089/lgbt.2016.0134

- 706 39. Akama EO, Beres LK, Kulzer JL, Ontuga G, Adhiambo H, Bushuru S, et al. A youth-centered  
707 approach to improving engagement in HIV services: human-centered design methods and outcomes  
708 in a research trial in Kisumu Country Kenya. *BMJ Global Health*. 2023;8. doi:10.1136/bmjgh-2023-  
709 012606
- 710 40. Atuyambe LM, Kibira SPS, Bukenya J, Muhumuza C, Apolot RR, Mulogo E. Understanding sexual  
711 and reproductive health needs of adolescents: evidence from a formative evaluation in Wakiso  
712 district, Uganda. *BMC Reproductive Health*. 2015;12(35). doi.org/10.1186/s12978-015-0026-7
- 713 41. Mmari K, Blum RW. Risk and protective factors that affect adolescent reproductive health in  
714 developing countries: A structured literature review. *Glob Public Health*. 2007;4(4):350-366.  
715 doi:10.1080/17441690701664418
- 716 42. Jonas K, Zani B, Ramraj T, Chirinda W, Jama N, Basera W, et al. Service delivery models for  
717 enhancing linkage to and retention in HIV care services for adolescent girls and young women and  
718 adolescent boys and young men: A protocol for an overview of systematic reviews. *BMJ Open*.  
719 2022;12. doi:10.1136/bmjopwn-2021-060778
- 720 43. Wohlfeiler MB, Weber RP, Brunet L, Fusco J, Uranaka C, Cochran Q, et al. HIV retention in care:  
721 Results and lessons learned from the Positive Pathways Implementation Trial. *BMC Prim Care*.  
722 2022;23:297. doi:10.1186/s12875-022-01909-2
- 723 44. Langat EC, Mohiddin A, Kidere F, Omar A, Akuno J, Naanyu V, et al. Challenges and opportunities  
724 for improving access to adolescent and youth sexual and reproductive health services and information  
725 in the coastal countries of Kenya: A qualitative study. *BMC Public Health*. 2024;24:484.  
726 doi:10.1186/s12889-024-17999-9
- 727 45. World Health Organization. Adolescent-friendly health services for adolescents living with HIV:  
728 From theory to practice. Technical Brief. Geneva, Switzerland: World Health Organization; 2019.  
729 Available from: <https://iris.who.int/bitstream/handle/10665/329993/WHO-CDS-HIV-19.39-eng.pdf>
- 730 46. Ndayishimiye P, Uwase R, Kubwimana I, Niyonzima JDIC, Dzekem RD, Nyandwi JB, et al.  
731 Availability accessibility and quality of adolescent sexual and reproductive health services in urban

- 732 health facilities of Rwanda: A survey among social and healthcare providers. *BMC Health Serv Res.*  
733 2020;20:697. doi:10.1186/s12913-020-05556-0
- 734 47. Willis N, Milanzi A, Mawodzeke M, Dziwa C, Armstrong A, Yekeye I, et al. Effectiveness of  
735 community adolescent treatment supporters (CATS) interventions in improving linkage and retention  
736 in care adherence to ART and psychosocial well-being: A randomized trial among adolescents living  
737 with HIV in rural Zimbabwe. *BMC Public Health.* 2019;19:117. doi:10.1186/s12889-019-6447-4
- 738 48. Nicol E, Jama NA, Mehlomakulu V, Hlongwa M, Pass D, Basera W, et al. Enhancing linkage to HIV  
739 care in the “Universal Test and Treat” era: Barriers and enablers to HIV care among adults in a high  
740 HIV burdened district in KwaZulu-Natal South Africa. *BMC Public Health.* 2023;23:1756.  
741 doi:10.1186/s12889-023-16576-w
- 742 49. Bedingar E, Bedingar N, Seli D, Sudfeld C. Adolescent dating and HIV perceptions: A  
743 phenomenological study in N’Djamena, Chad. *medRxiv.* 2024.  
744 doi.org/10.1101/2024.03.28.24304942.

745

## 746 **Supporting Information**

747 **S1 File. Stages and processes of the constructivist grounded approach employed for parent study to**  
748 **enable a youth sensemaking outcome on youth-centered decision making in HIV care in Chad.**

749 **S2 File. Flowchart of sub-divided participants in each group.**

750 **S3 File. Focus group discussion topic guide for youth.**

751 **S4 File. Focus group discussion topic guide for healthcare workers.**

752 **S5 File. Focus group discussion topic guide for community actors.**

753 **S1 Table. Themes identified through focus group discussions with participants.**

754 **S2 Table. Healthcare sectors identified for the current pathways to care for HIV-negative youth.**

755 **S3 Table. Healthcare sectors identified for the current pathways to care for HIV-positive youth.**



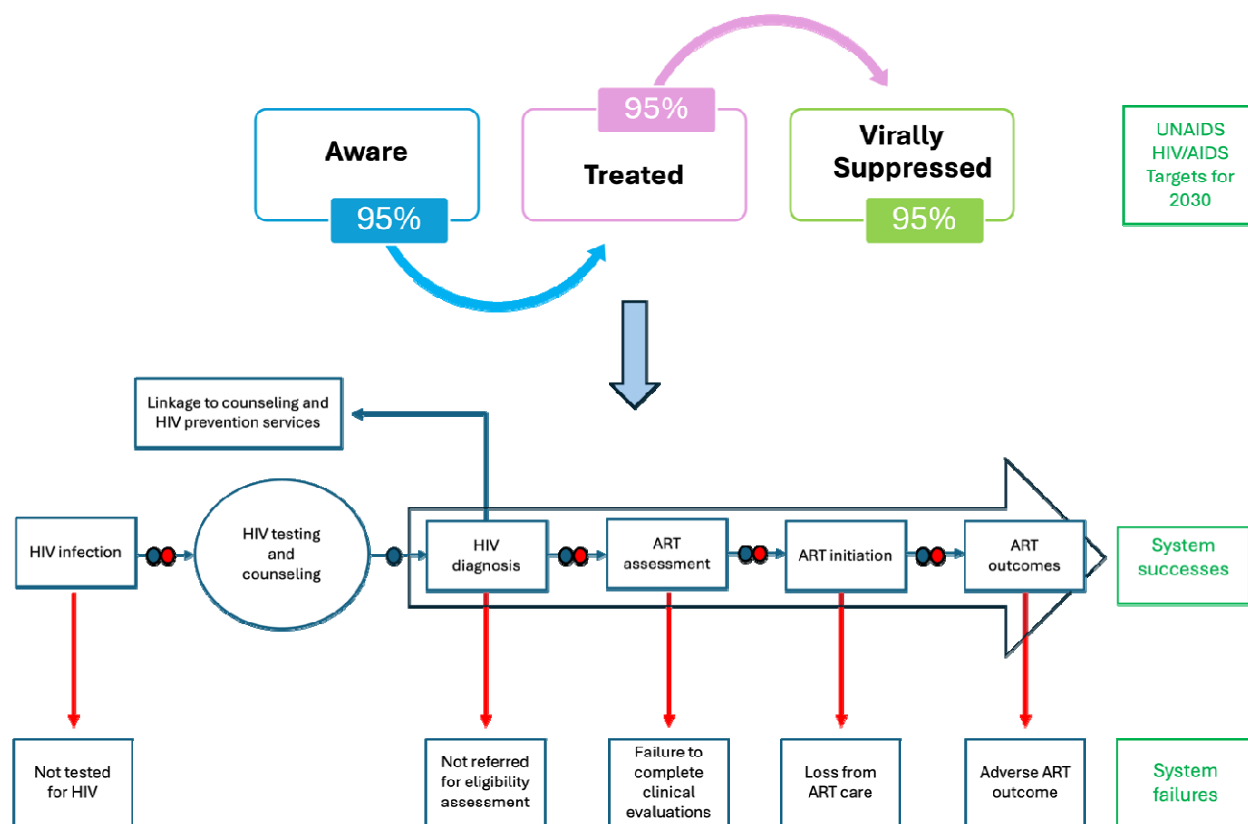

**Figure 1. Overall adolescent-focused HIV pathway to care in Chad.**

**Notes:** In this process, blue and red circles on the arrows indicate the presence of healthcare workers and community actors, respectively. Figure 3 was informed by the grounded theory data collection, which included in-depth interviews and focus group discussions through a participatory action research. It was further inspired by MacPherson et al. (2012), MacPherson et al. (2015), Herce et al. (2019), UNAIDS (2020); and adapted from a figure by Kranzer et al. (2012).



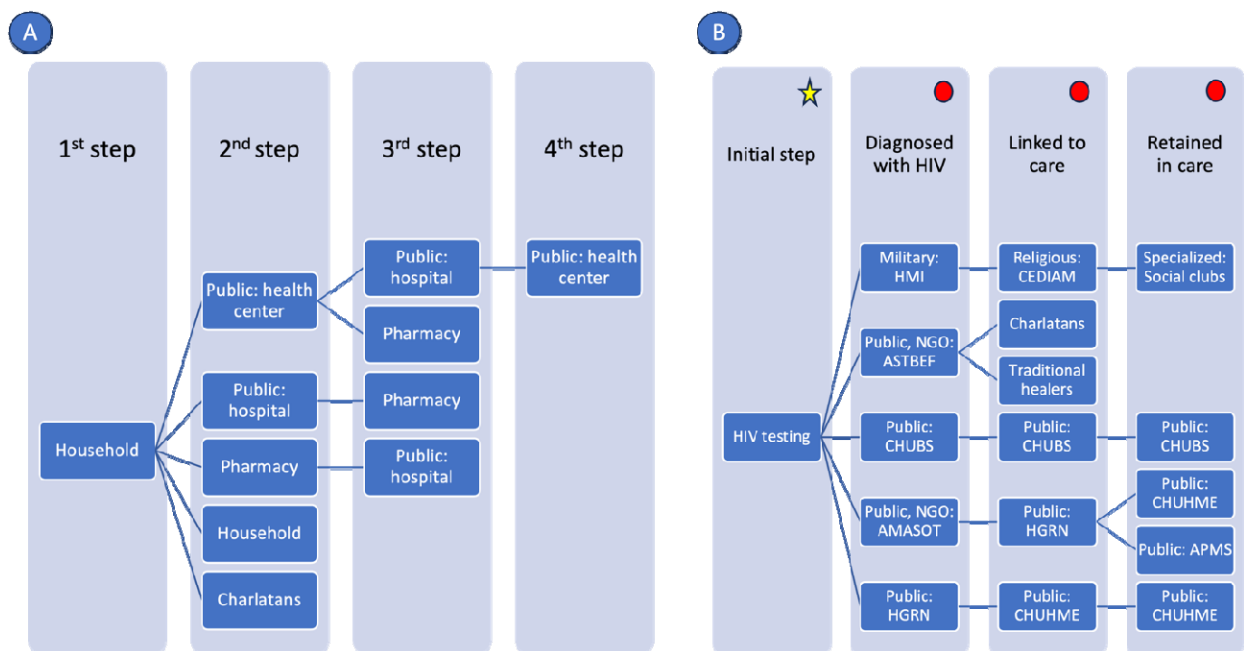

**Figure 2. The current pathways to care experienced by A) HIV-negative and B) HIV-positive youth.**

**Notes:** Public sectors are managed and operated by the Ministry of Health, and include health posts, health centers, and hospitals; Private sectors are privately-run, non-governmental healthcare site; Pharmacy sector is a business selling medications and/or offering consultations for medical complaints, usually for-profit; Traditional healers or those using rituals, herbal remedies, spiritual healing and other methods based on the cultural and spiritual beliefs of their community, usually for-profit. Charlatans or fake doctors are individuals who falsely claim to be qualified healthcare workers. For figure 4B, yellow star represents HIV-positive youth whose diagnoses often occurred during routine medical visits or emergencies prompted by recurrent illnesses or family-initiated tests, and red circles represent community actors, including psychosocial counselors, expert patients, mentor moms, and peer educators operating throughout the HIV continuum of care. Additional information on the description of healthcare sectors is in supplementary exhibit 6.

**Table 1. Sample demographics for youth and service providers.**

|                                 | N                | %            |
|---------------------------------|------------------|--------------|
| <b><i>Youth</i></b>             |                  |              |
| Total                           | 52               | 100          |
| Sex                             |                  |              |
| Male                            | 28               | 53.8         |
| Female                          | 24               | 46.2         |
| HIV status                      |                  |              |
| HIV positive                    | 23               | 44.2         |
| HIV negative                    | 29               | 55.8         |
| Religion                        |                  |              |
| Muslim                          | 5                | 9.6          |
| Christian                       | 47               | 93.4         |
| Highest educational level       |                  |              |
| No diploma                      | 7                | 13.5         |
| Enrolled in high school         | 28               | 53.8         |
| High school diploma             | 11               | 21.2         |
| Bachelor's degree               | 6                | 11.5         |
| Marital status                  |                  |              |
| Single                          | 48               | 92.3         |
| Married                         | 4                | 7.7          |
|                                 | <b>Mean (SD)</b> | <b>Range</b> |
| Age                             | 19.5 (0.90)      | 15-24        |
| <b><i>Service providers</i></b> |                  |              |
| Total                           | 48               | 100          |
| Sex                             |                  |              |
| Male                            | 29               | 60.4         |

|                 |    |      |
|-----------------|----|------|
| Female          | 19 | 39.6 |
| Provider type   |    |      |
| Nurse           | 12 | 25   |
| Physician       | 12 | 25   |
| Community actor | 24 | 50   |
| Facility type   |    |      |
| Public          | 38 | 79.2 |
| Specialized     | 10 | 20.8 |

**Table 1. Themes identified through focus group discussions with participants.**

| Theme                              | Subtheme                 | Definition                                                                                                                                                                                                                |
|------------------------------------|--------------------------|---------------------------------------------------------------------------------------------------------------------------------------------------------------------------------------------------------------------------|
| <b>HIV testing</b>                 |                          |                                                                                                                                                                                                                           |
|                                    | Accessibility of testing | Refers to the ease with which youth can access HIV testing services, including the availability of testing facilities, the cost of testing, and the proximity of these centers to their homes or schools.                 |
|                                    | Awareness and knowledge  | The level of information youth have about HIV testing, including where and how to get tested, the importance of regular testing, and understanding the implications of the test results.                                  |
|                                    | Psychological barriers   | The emotional and mental challenges that youth face when considering HIV testing, such as fear of a positive result, stigma associated with being tested, and general anxiety about the testing process.                  |
|                                    | Support systems          | The role of family members, peers, and healthcare providers, including community actors in encouraging and facilitating youth to undergo HIV testing, providing emotional support, and creating a supportive environment. |
| <b>Linkage to HIV care and ART</b> |                          |                                                                                                                                                                                                                           |
|                                    | Referral processes       | The mechanisms and procedures through which youth who test positive for HIV are directed to appropriate HIV care and treatment services.                                                                                  |
|                                    | Initial engagement and   | The initial interactions and obstacles faced by youth when they first attempt to engage with HIV care and                                                                                                                 |

|                              |                                             |                                                                                                                             |
|------------------------------|---------------------------------------------|-----------------------------------------------------------------------------------------------------------------------------|
|                              | barriers to linkage                         | treatment services.                                                                                                         |
|                              | Facilitators of linkage                     | Factors and interventions that help youth successfully connect with HIV care and treatment services after testing positive. |
| <b>Retention in ART care</b> |                                             |                                                                                                                             |
|                              | Adherence to treatment                      | The extent to which youth consistently take their antiretroviral medications as prescribed.                                 |
|                              | Continuous engagement                       | The ongoing interaction between youth and healthcare providers to ensure they remain in HIV care over the long term.        |
|                              | Retention challenges and support strategies | The difficulties youth face in staying in HIV care and the strategies used to support them in overcoming these challenges.  |

**Table 1. Quotes from HIV-positive youth on diagnoses following HIV testing with family support.**

| <b>Participants</b> | <b>Age range</b> | <b>Quotes</b>                                                                                                                                                                                          |
|---------------------|------------------|--------------------------------------------------------------------------------------------------------------------------------------------------------------------------------------------------------|
| Participant 30      | 15-19 years      | <i>For me, [I was screened] (age range 15-19 years old), following a serious illness but none of my family had HIV. I was not sexually active; so, it's a bit strange for me to know how I got it.</i> |
| Participant 32      | 20-24 years      | <i>I was screened due to recurrent illnesses.</i>                                                                                                                                                      |
| Participant 33      | 15-19 years      | <i>My [parent] did it when I was [younger] (age range 5-9 years old).</i>                                                                                                                              |
